# Supplementary material for: An observational study of environmental exposures, airway cytology, and performance in racing thoroughbreds
Source: PubMed Central journal article supplement — J Vet Intern Med. 2018 Sep 17;32(5):1754–62. doi: 10.1111/jvim.15226 (PMC6189343; doi:10.1111/jvim.15226), 2018-09-17
Supplement: JVIM-32-1754-s010.pdf [file JVIM-32-1754-s010.pdf]

Supplemental Table 1: Clinical scoring system adapted from Tesarowski et al., 1996.

| <b>Variable</b>                | <b>Descriptor</b>                               | <b>Score</b> |
|--------------------------------|-------------------------------------------------|--------------|
| Respiratory rate (breaths/min) | < 15                                            | 0            |
|                                | 16-20                                           | 1            |
|                                | 21-25                                           | 2            |
|                                | 26-29                                           | 3            |
|                                | >30                                             | 4            |
| Nasal discharge                | None                                            | 0            |
|                                | Serous                                          | 1            |
|                                | Mucopurulent                                    | 3            |
| Abdominal lift                 | None                                            | 0            |
|                                | Mild (perceptible heave line)                   | 1            |
|                                | Pronounced (abdomen, thorax, and anal movement) | 3            |
| Nasal flaring                  | None                                            | 0            |
|                                | Present                                         | 1            |
| Tracheal sounds                | Normal (tubular sound)                          | 0            |
|                                | Increase in intensity                           | 1            |
|                                | Mucus movement                                  | 3            |
| Crackles                       | None                                            | 0            |
|                                | Present                                         | 2            |
| Wheezes                        | None                                            | 0            |
|                                | Present                                         | 2            |
| Cough                          | None                                            | 0            |
|                                | Intermittent                                    | 1            |
|                                | Paroxysmal                                      | 3            |
| <b>Total</b>                   |                                                 | <b>/21</b>   |
